# Supplementary material for: Intracrystalline melt migration in deformed olivine revealed by trace element compositions and polyphase solid inclusions
Source: Copernicus journal article supplement (doi:10.5194/ejm-33-463-2021), 2021-08-12
Supplement: Supplementary file 1 [file ejm-33-463-2021-supplement.zip]

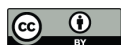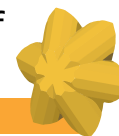

*Supplement of*

**Intracrystalline melt migration in deformed olivine revealed by trace element compositions and polyphase solid inclusions**

**Valentin Basch et al.**

*Correspondence to:* Valentin Basch ([valentin.basch@gmail.com](mailto:valentin.basch@gmail.com))

- [ejm-33-463-2021-supplement-title-page.pdf](#)
- [Figure S1 Spectra SEM.png](#)
- [Figure S2 Mixed REE patterns.png](#)
- [Supplementary Material - Methodologies.docx](#)
- [Table S1 - Studied samples.xlsx](#)
- [Table S2 - Olivine trace element compositions.xlsx](#)
- [Table S3 - Inclusions.xlsx](#)
- [Table S4 - BIR1-G - Detection limit - Sensitivity.xlsx](#)

The copyright of individual parts of the supplement might differ from the article licence.
